# Supplementary material for: A scalable adaptive quadratic kernel method for interpretable epistasis analysis in complex traits
Source: HighWire-hosted journal article supplement (doi:10.1101/gr.279140.124), 2024-08-29
Supplement: Supplemental_References.docx [file Supplemental_References.docx]

**Supplemental References**

Wu MC, Lee S, Cai T, Li Y, Boehnke M, Lin X. 2011. Rare-variant association

testing for sequencing data with the sequence kernel association test.

*Am J Hum Genet* **89:** 82–93. doi:10.1016/j.ajhg.2011.05.029

Zhou JJ, Hu T, Qiao D, Cho MH, Zhou H. 2016. Boosting gene mapping

power and efficiency with efficient exact variance component tests of

single nucleotide polymorphism sets. *Genetics* **204:** 921–931. doi:10

.1534/genetics.116.190454
